# Supplementary material for: Genomic Characteristics of Colistin-Resistant Salmonella enterica subsp. enterica Serovar Infantis from Poultry Farms in the Republic of Serbia
Source: MDPI journal article supplement (doi:10.3390/antibiotics9120886), 2020-12-10
Supplement: s1 [file s1]

# Genomic Characteristics of Colistin-Resistant *Salmonella enterica* subsp. *enterica* serovar *Infantis* from Poultry Farms in the Republic of Serbia

Branko Jovčić <sup>1,2</sup>, Katarina Novović <sup>1</sup>, Brankica Filipić <sup>3</sup>, Maja Velhner <sup>4,\*</sup>, Dalibor Todorović <sup>4</sup>, Kazimir Matović <sup>5</sup>, Zoran Rašić <sup>6</sup>, Sonja Nikolić <sup>7</sup>, Ferenc Kiškarolj <sup>8</sup>, and Milan Kojić <sup>1</sup>

<sup>1</sup> Institute of Molecular Genetics and Genetic Engineering, University of Belgrade, Belgrade 11010, Serbia; [bjovcic@bio.bg.ac.rs](mailto:bjovcic@bio.bg.ac.rs) (B.J.); [katarinanovovic@imgge.bg.ac.rs](mailto:katarinanovovic@imgge.bg.ac.rs) (K.N.), [mkojic@imgge.bg.ac.rs](mailto:mkojic@imgge.bg.ac.rs) (M.K.)

<sup>2</sup> Faculty of Biology, University of Belgrade, Belgrade 11000, Serbia

<sup>3</sup> Faculty of Pharmacy, University of Belgrade, Belgrade 11000, Serbia; [brankica.filipic@pharmacy.bg.ac.rs](mailto:brankica.filipic@pharmacy.bg.ac.rs)

<sup>4</sup> Scientific Veterinary Institute “Novi Sad”, Novi Sad 21000, Serbia; [dalibor@niv.ns.ac.rs](mailto:dalibor@niv.ns.ac.rs)

<sup>5</sup> Veterinary Specialized Institute “Kraljevo”, Kraljevo 36000, Serbia; [matovic@vsikv.com](mailto:matovic@vsikv.com)

<sup>6</sup> Veterinary Specialized Institute “Jagodina”, Jagodina 35000, Serbia; [vsij.rasic@gmail.com](mailto:vsij.rasic@gmail.com)

<sup>7</sup> Veterinary Specialized Institute “Niš”, Niš 18000 Serbia; [sonjavsinis@gmail.com](mailto:sonjavsinis@gmail.com)

<sup>8</sup> Veterinary Specialized Institute “Subotica”, Subotica 24000, Serbia; [kiskarolj.ferenc@vsiu.co.rs](mailto:kiskarolj.ferenc@vsiu.co.rs)

\* Correspondence: [maja@niv.ns.ac.rs](mailto:maja@niv.ns.ac.rs)

**Table S3.** The CRISPR/Cas loci of seven colistin-resistant *S. Infantis* isolates detected using CRISPRCasFinder program.

| Strain | Element     | CRISPR Id/Cas type                    | Start  | End    | Spacer/Gene | Repeat consensus/ <i>cas</i> genes                                                                |
|--------|-------------|---------------------------------------|--------|--------|-------------|---------------------------------------------------------------------------------------------------|
| 821    | CRISPR      | NODE_2_length_695018_cov_34_38829_1_1 | 207661 | 208177 | 8           | CGGTTTATCCCCGCTGGCGCGGGGAACAC (-)                                                                 |
|        | Cas cluster | General-Class1                        | 208274 | 576393 | 9           | Cas1_0_IE, Cas2_0_IE, Cas3_0_IE, Cas3_0_IE, Cas5_0_IE, Cas6_0_IE, Cas7_0_IE, Cse1_0_IE, Cse2_0_IE |
|        | CRISPR      | NODE_2_length_695018_cov_34_38829_1_2 | 224329 | 224968 | 10          | CGGTTTATCCCCGCTGGCGCGGGGAACAC (-)                                                                 |
| 92     | CRISPR      | NODE_3_length_204876_cov_26_23218     | 182238 | 182754 | 8           | CGGTTTATCCCCGCTGGCGCGGGGAACAC (-)                                                                 |

|           |             |                                       |        |        |    |                                                                                                   |
|-----------|-------------|---------------------------------------|--------|--------|----|---------------------------------------------------------------------------------------------------|
|           |             | 2_1                                   |        |        |    |                                                                                                   |
|           | Cas cluster | General-Class1                        | 182851 | 191304 | 8  | Cas1_0_IE, Cas2_0_IE, Cas3_0_IE, Cas5_0_IE, Cas6_0_IE, Cas7_0_IE, Cse1_0_IE, Cse2_0_IE            |
|           | CRISPR      | NODE_3_length_204876_cov_26_23218_2_1 | 198906 | 199545 | 10 | CGGTTTATCCCCGCTGGCGCGGGGAACAC (-)                                                                 |
| 1371/1    | CRISPR      | NODE_3_length_526594_cov_23_61661_0_1 | 216751 | 218647 | 30 | CGGTTTATCCCCGCTGGCGCGGGGAACAC (-)                                                                 |
|           | Cas cluster | General-Class1                        | 218744 | 437702 | 9  | Cas1_0_IE, Cas2_0_IE, Cas3_0_IE, Cas3_0_IE, Cas5_0_IE, Cas6_0_IE, Cas7_0_IE, Cse1_0_IE, Cse2_0_IE |
|           | CRISPR      | NODE_3_length_526594_cov_23_61661_0_2 | 234929 | 236545 | 26 | CGGTTTATCCCCGCTGGCGCGGGGAACAC (-)                                                                 |
| 9181/1    | Cas cluster | General-Class1                        | 88893  | 307851 | 9  | Cas1_0_IE, Cas2_0_IE, Cas3_0_IE, Cas3_0_IE, Cas5_0_IE, Cas6_0_IE, Cas7_0_IE, Cse1_0_IE, Cse2_0_IE |
|           | CRISPR      | NODE_3_length_416378_cov_28_02480_5_1 | 290050 | 291666 | 26 | GTGTTCCCCGCGCCAGCGGGGATAAACCG (+)                                                                 |
|           | CRISPR      | NODE_3_length_416378_cov_28_02480_5_2 | 307948 | 309844 | 30 | GTGTTCCCCGCGCCAGCGGGGATAAACCG (+)                                                                 |
| 8418/2948 | Cas cluster | General-Class1                        | 88893  | 307851 | 9  | Cas1_0_IE, Cas2_0_IE, Cas3_0_IE, Cas3_0_IE, Cas5_0_IE, Cas6_0_IE, Cas7_0_IE, Cse1_0_IE, Cse2_0_IE |
|           | CRISPR      | NODE_3_length_416378_cov_28_02480_5_1 | 290050 | 291666 | 26 | GTGTTCCCCGCGCCAGCGGGGATAAACCG (+)                                                                 |
|           | CRISPR      | NODE_3_length_416378_cov_28_02480_5_2 | 307948 | 309783 | 29 | GTGTTCCCCGCGCCAGCGGGGATAAACCG (+)                                                                 |
| 9520/2    | CRISPR      | NODE_4_length_416384_cov_17_64644_0_1 | 106535 | 108431 | 30 | CGGTTTATCCCCGCTGGCGCGGGGAACAC (-)                                                                 |
|           | Cas cluster | General-Class1                        | 108528 | 327492 | 9  | Cas1_0_IE, Cas2_0_IE, Cas3_0_IE, Cas3_0_IE, Cas5_0_IE, Cas6_0_IE, Cas7_0_IE, Cse1_0_IE, Cse2_0_IE |
|           | CRISPR      | NODE_4_length_416384_cov_17_64644_0_2 | 124713 | 126329 | 26 | CGGTTTATCCCCGCTGGCGCGGGGAACAC (-)                                                                 |
| 3842      | CRISPR      | NODE_3_length_332755_cov_41_01606     | 221693 | 222392 | 11 | CGGTTTATCCCCGCTGGCGCGGGGAACAC (-)                                                                 |

|  |             |                                          |        |        |    |                                   |
|--|-------------|------------------------------------------|--------|--------|----|-----------------------------------|
|  |             | 0_1                                      |        |        |    |                                   |
|  | Cas cluster | General-Class1                           | 222368 | 224440 | 1  | Cas3_0_IE                         |
|  | CRISPR      | NODE_3_length_332755_cov_41_01606<br>0_2 | 232155 | 233465 | 21 | CGGTTTATCCCCGCTGGCGCGGGGAACAC (-) |

**Table S4.** Primers used in this study.

| Primer          | Sequences                      | Product size (bp) | Reference  |
|-----------------|--------------------------------|-------------------|------------|
| <i>phoP</i> Fw  | 5' GATACGCCGCTGGCGCAGCAG 3'    | 147               | This study |
| <i>phoP</i> Rev | 5' CGCGCCATTACCTCTTCGATG 3'    |                   |            |
| <i>phoQ</i> Fw  | 5' CCGGAGACGACGCGTGAGCTG 3'    | 147               |            |
| <i>phoQ</i> Rev | 5' CGTACTCTGCAAAACCGCGAG 3'    |                   |            |
| <i>mgrB</i> Fw  | 5' CGATGGGTCGTTCTCGGCATC 3'    | 111               |            |
| <i>mgrB</i> Rev | 5' GATGGCGCAAATACCGCTG 3'      |                   |            |
| <i>pmrA</i> Fw  | 5' CCCTGCCGGTACTCATTCTG 3'     | 154               |            |
| <i>pmrA</i> Rev | 5' CCCTGGTTATTATGGCGGC 3'      |                   |            |
| <i>pmrB</i> Fw  | 5' CCGTCGTCTCGGCGATCAATC 3'    | 164               |            |
| <i>pmrB</i> Rev | 5' CGGCGCGACATCAACATTGTG 3'    |                   |            |
| <i>gyrB</i> Fw  | 5' GGTCTGCCGGGCAAACCTGG 3'     | 149               |            |
| <i>gyrB</i> Rev | 5' GAGGATTTTACCTTTCAGCGGCAG 3' |                   |            |

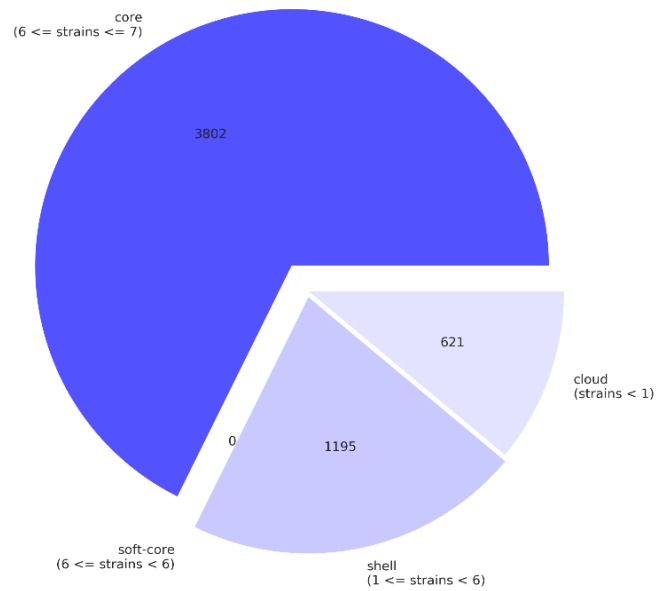

**Figure S1.** Distribution of the core and accessory genes within pan-genome.

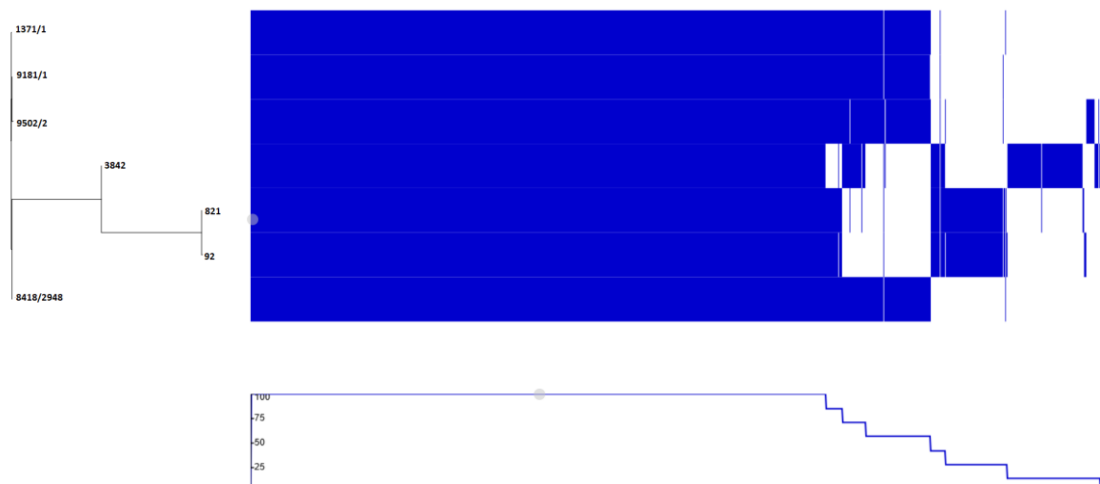

**Figure S2.** Visualization of pan-genome constructed using Roary based on the core and accessory genes showing phylogenetic relatedness of the isolates by blue (present) and white (absent) fragments. At the bottom of the figure the percentage of strains that have each gene is shown.

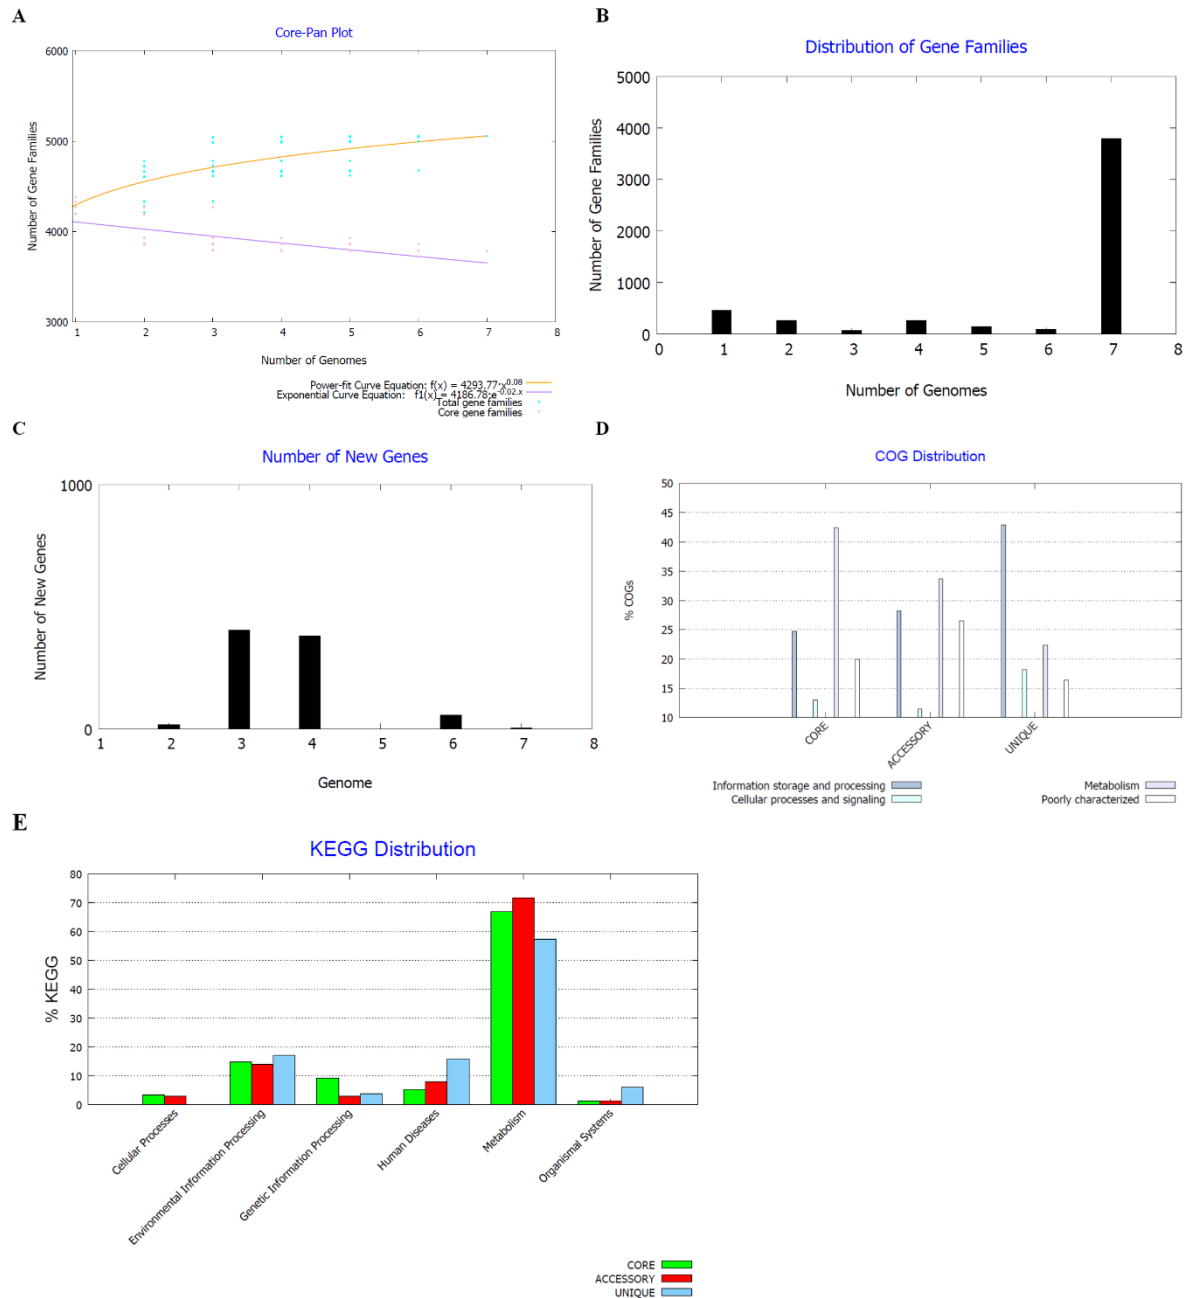

**Figure S3.** Pan-genome analysis: pan and core genome curves (A); frequency distribution of gene families within genomes (B); the number of new genes added to each genome (C); the COG and KEGG distribution of the representative proteins in the core, accessory, and unique genome (D and E).
